# Supplementary material for: Human somatic cells subjected to genetic induction with six germ line-related factors display meiotic germ cell-like features
Source: PubMed Central journal article supplement (PMC4844986; doi:10.1038/srep24956), 2016-04-26
Supplement: srep24956-s1.pdf [file srep24956-s1.pdf]

# **Human somatic cells subjected to genetic induction with six germ line-related factors display meiotic germ cell-like features**

Jose V. Medrano<sup>1,2,+</sup>, Ana M. Martínez-Arroyo<sup>1,+</sup>, Jose M. Míguez<sup>1</sup>, Inmaculada Moreno<sup>3</sup>, Sebastián Martínez<sup>1</sup>, Alicia Quiñonero<sup>1</sup>, Patricia Díaz-Gimeno<sup>1</sup>, Ana I. Marqués-Marí<sup>4</sup>, Antonio Pellicer<sup>2</sup>, Jose Remohí<sup>1</sup> & Carlos Simón<sup>1,3,5\*</sup>

<sup>1</sup>Fundación Instituto Valenciano de Infertilidad (FIVI), INCLIVA; Department of Pediatrics, Obstetrics and Gynecology, Valencia University; Valencia, 46015; Spain

<sup>2</sup>Fundación Instituto de Investigación Sanitaria La Fe; Valencia, 46015; Spain

<sup>3</sup>Igenomix S.L.; Paterna, 46980; Spain

<sup>4</sup>Valencia Node of the Spanish Stem Cell Bank, Prince Felipe Research Centre (CIPF) Valencia, 46012; Spain

<sup>5</sup>Department of Obstetrics and Gynecology, Stanford University; Stanford, CA 94305; USA

**<sup>+</sup>These authors contributed equally to this work.**

**\*Correspondence and reprint requests should be addressed to:** Prof. Carlos Simon at Fundación Instituto Valenciano de Infertilidad (FIVI), PARC CIENTIFIC UNIVERSITAT DE VALENCIA, Catedrático Agustín Escardino 9, 46980 Paterna (Valencia), Spain; Phone: +34 963903305; Fax: +34 963902522; E-mail: [carlos.simon@ivi.es](mailto:carlos.simon@ivi.es)

## **1. Inventory of Supplementary Information**

**Supplementary Figure S1. Analysis of the expression of induced factors over hFSK cells.**

**Supplementary Figure S2. Screening among i12F factors over hFSK cells.**

**Supplementary Figure S3. Supplementary information regarding culture set up, transcriptomic characterization of induced hFSK cells.**

**Supplementary Figure S4. Supplementary data regarding meiotic progression analysis in hFSK induced cells.**

**Supplementary Figure S5. Supplementary data regarding culture phenotype, meiotic progression analysis and transcriptomics in hMSC induced cells.**

**Supplementary Figure S6: Supplemental data relative to xenotransplant experiments.**

**Supplementary Figure S7. Male and female gonadal specific marker analysis and antibody staining controls.**

**Supplementary Table S1. List of the top represented terms of the functional enrichment analysis over the i12F and i6F cultures compared to MOCK.**

**Supplementary Table S2. Summary of FISH-based ploidy counts in hFSK cells.**

**Supplementary Table S3. Summary of FISH-based ploidy counts in hMSC cells.**

**Supplementary Table S4. Primer sequences used to gene expression analysis by RT-qPCR.**

**Supplementary Table S5. List of the antibodies employed.**

## 2. Supplementary Figures and Legends.

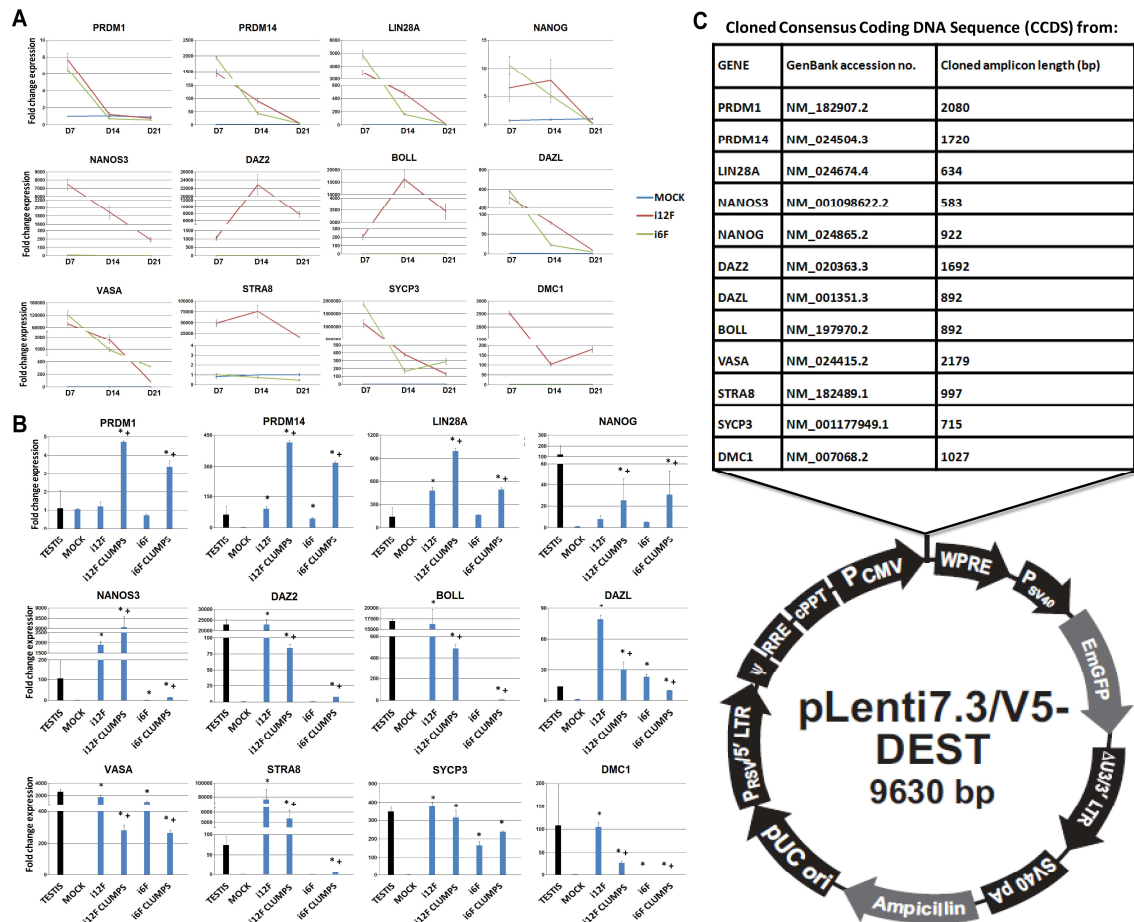

**Supplementary Figure S1. Analysis of the expression of induced factors over hFSK cells. (A)** Time course analysis of the mRNA expression of the transduced factors at 7, 14 and 21 days post-transduction in MOCK, i12F and i6F conditions (n=3). **(B)** RTqPCR expression analysis of the twelve overexpressed factors at day 14 post-transduction over i12F, i12 clumps, i6F and i6F clumps (n=3). Human testis cDNA physiological expression fold change relative to MOCK samples is also shown as a control. Data is presented as normalized fold change mean +/- SEM. (\*) represent significant differences (p<0.05) with MOCK controls; (+) represents significant differences (p<0.05) between i12F/i6F conditions and their respective induced germ cell-like cell clumps. **(C)** Overview of the cloning methodology employed for the construction of lentiviral vectors. The table shows information regarding GeneBank

accession numbers, primers employed for the isolation of the cloned CCDSs and length of the amplicons. The map of the pLenti7.3/V5-DEST backbone with the site of insertion of cloned CCDSs is also shown.

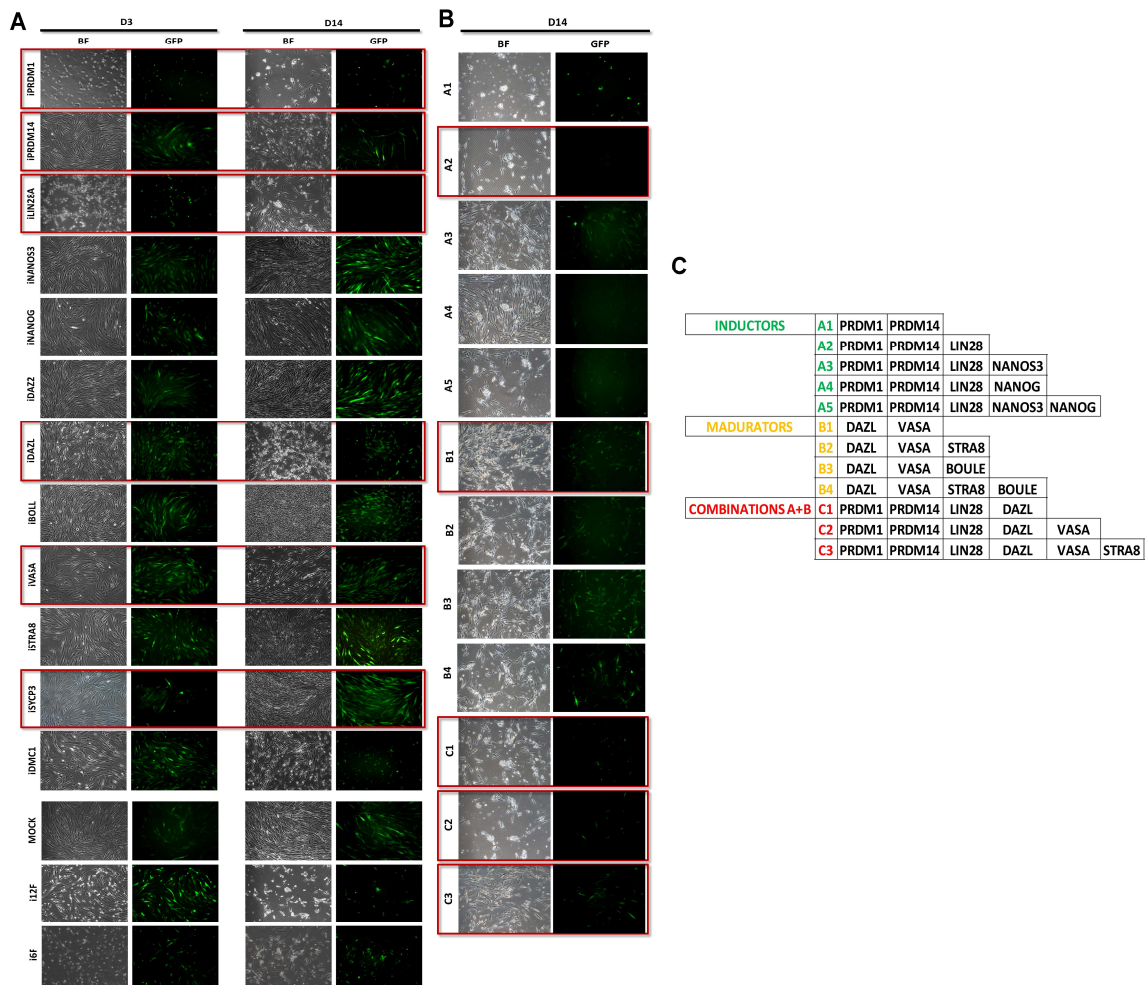

**Supplementary Figure S2. Screening among i12F factors over hFSK cells. (A)** Illustrative bright field and GFP fluorescence pictures at days 3 and 14 post-transduction of human fibroblasts subjected to the overexpression of each germ line-related factor alone and subjected to MOCK, i12F and i6F transduction. Scale bar represents a distance of 50µm. **(B)** Illustrative bright field and GFP fluorescence pictures of hFSK cells subjected to the overexpression of the most interesting combinations of factors among i12F that generated the formation of clumps. Red rectangles highlight the most efficient factors/combinations to induce the formation of clumps.

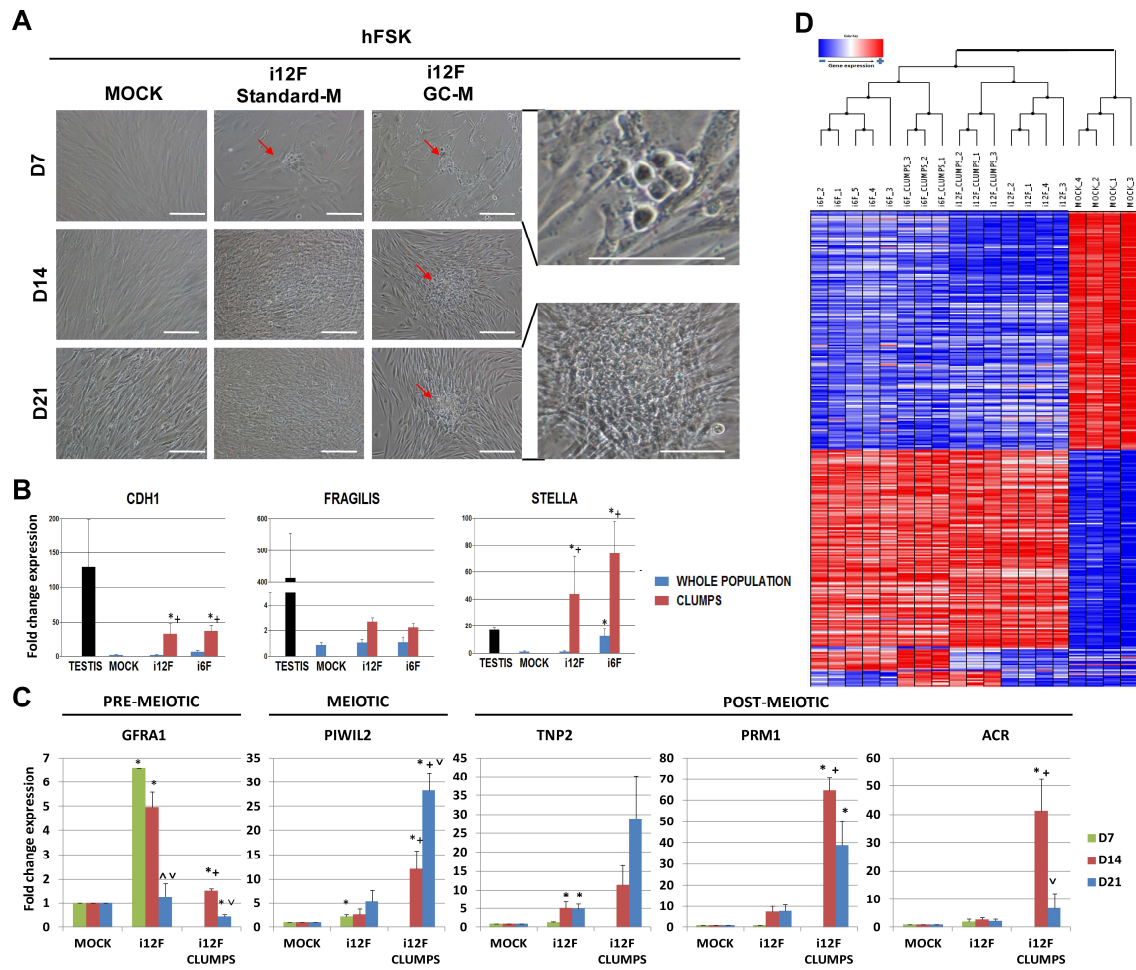

**Supplementary Figure S3. Supplementary information regarding culture set up, transcriptomic characterization of induced hFSK cells. (A)** Illustrative pictures at 7, 14 and 21 days post-transduction of the formation of induced germ cell-like cell clumps (indicated by red arrows) showing the morphology of primary cultures after transduction with the germ cell factors in standard and germ cell medium (GC-M). Higher magnifications correspond to hFSK cells at early (7 days) and late (21 days) time points post-transduction, respectively. **(B)** Expression analysis of the epithelial marker CDH1 and the early germ cell markers FRAGILIS and STELLA 14 days post-transduction with i12F/i6F transduced hFSK cells (n=3). **(C)** RT-qPCR expression analysis of the germ line markers *GFRA1*, *PIWIL2*, *TNP2*, *PRM1*, and *ACR* over i12F induced hFSKs at 7, 14 and 21 days post-transduction (n=8). **(D)** Unsupervised hierarchical clustering and heat map of differentially expressed genes in induced hFSKs.

Data is presented as normalized fold change mean  $\pm$  SEM. (\*) represent significant differences ( $p < 0.05$ ) with MOCK controls; (+) represents significant differences ( $p < 0.05$ ) between i12F/i6F conditions and their respective induced germ cell-like cell clumps; ( $\wedge$ ) represent significant differences ( $p < 0.05$ ) with day 7 expression within sample groups; ( $\vee$ ) represent significant differences ( $p < 0.05$ ) with day 14 expression within sample groups. Scale bar represents a distance of  $50\mu\text{m}$ .

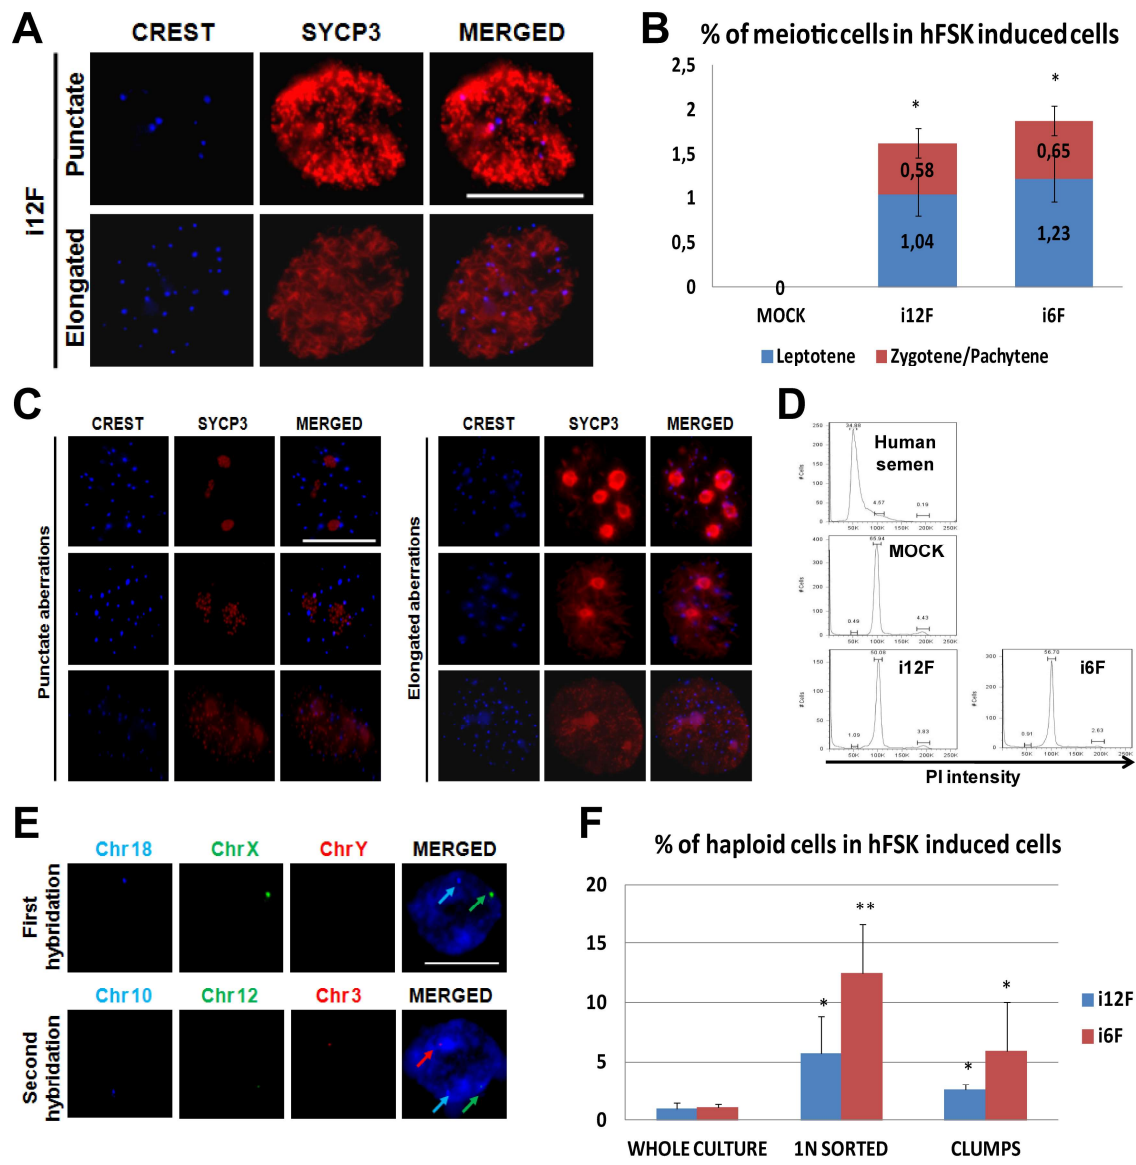

**Supplementary Figure S4. Supplementary data regarding meiotic progression analysis in hFSK induced cells. (A)** Illustrative pictures of the SYCP3 staining pattern over i12F transduced cells. **(B)** Percentage of punctate/elongated staining pattern found in i12F and i6F transduced hFSK cells (n=8). **(C)** Aberrant SYCP3 staining patterns found over transduced cells. **(D)** Representative DNA-fluorescence-activated cell sorting plots for the isolation of the putative 1N populations. Sperm control was used to set the sorting parameters. **(E)** Re-hybridization of chromosomes 18, X and Y FISH analyzed nuclei with centromeric probes for chromosomes 10 (aqua), 12 (green) and 3 (red) confirms haploidy of induced cells. **(F)** Percentage of haploid cells found in



i12F/i6F treated cells based on the FISH analysis with probes for the chromosomes 18, X and Y in hFSK cells (n=8). Data is presented as mean  $\pm$  SEM. (\*) and (\*\*) represent significant differences ( $p < 0.05$  and  $p < 0.01$ , respectively) with MOCK and MOCK 1N sorted controls, respectively. Scale bars represent a distance of 10 $\mu$ m.

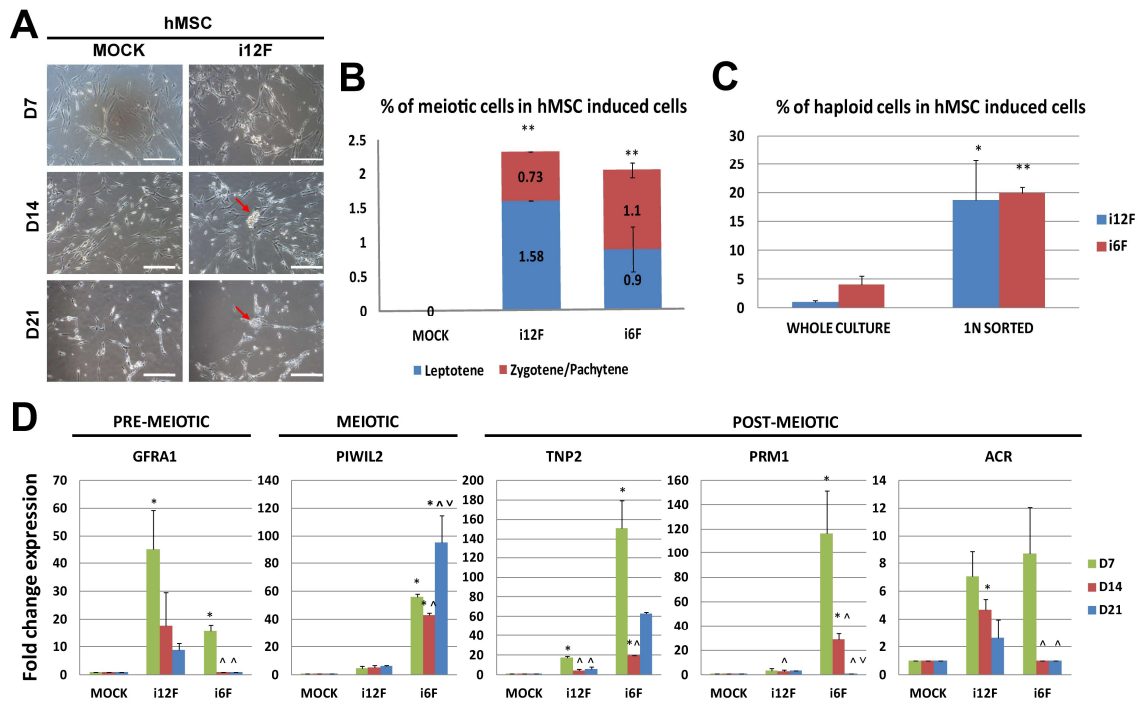

**Supplementary Figure S5. Supplementary data regarding culture phenotype,**

**meiotic progression analysis and transcriptomics in hMSC induced cells. (A)**

Illustrative pictures at 7, 14 and 21 days post-transduction of the formation of induced germ cell-like cell clumps (indicated by red arrows) showing the morphology of

primary cultures after transduction with the germ cell factors in standard and germ cell

medium (GC-M). Scale bars represent a distance of 10 $\mu$ m. **(B)** Percentage of

punctate/elongated staining pattern found in i12F and i6F transduced hMSCs (n=4). **(C)**

Percentage of haploid cells found in i12F/i6F treated cells based on the FISH analysis

with probes for the chromosomes 18, X and Y in hMSC cells (n=4). Data is presented

as mean +/- SEM. (\*) and (\*\*) represent significant differences (p<0.05 and p<0.01,

respectively) with MOCK and MOCK 1N sorted controls. **(D)** RT-qPCR expression

analysis of the germ line markers *GFRA1*, *PIWIL2*, *TNP2*, *PRM1*, and *ACR* over

i12F/i6F induced hMSCs at 7, 14 and 21 days post-transduction (n=8). Data is presented

as normalized fold change mean +/- SEM. (\*) represent significant differences (p<0.05)

with MOCK controls; (+) represents significant differences (p<0.05) between i12F/i6F

conditions and their respective induced germ cell-like cell clumps; ( $\wedge$ ) represent significant differences ( $p < 0.05$ ) with day 7 expression within sample groups; ( $\vee$ ) represent significant differences ( $p < 0.05$ ) with day 14 expression within sample groups.

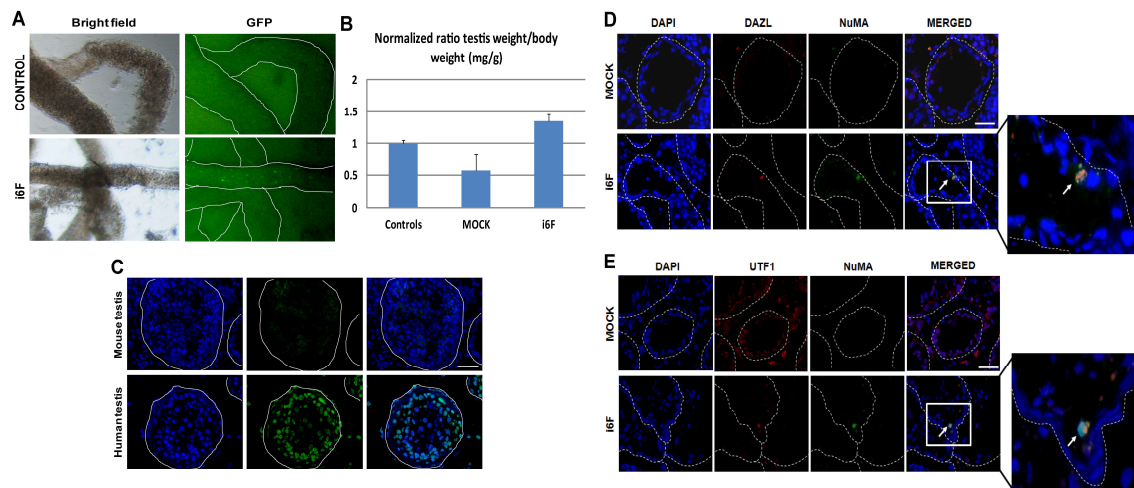

**Supplementary Figure S6. Supplementary data relative to xenotransplant**

**experiments. (A)** Illustrative pictures showing the presence of small GFP dots corresponding to putative colonizing cells within seminiferous tubules transplanted with i6F cells. **(B)** Normalized ratio of testis weight in milligrams with the body weight in grams of transplanted mice. Controls were busulfan treated but not transplanted mice (n=8 testes). **(C)** Illustrative staining of NuMA antibody localizing in the nucleus of human testicular cells but not in mouse. **(D)** Illustrative pictures showing co-localization of NuMA and DAZL and **(E)** NuMA/UTF1 in the nuclei of engrafted cells. Data is presented as mean +/- SEM. (\*) represent significant differences ( $p < 0.05$ ) with non transplanted controls; (+) represents significant differences ( $p < 0.05$ ) with MOCK transplanted testes. Periphery of tubule cross-sections are highlighted by dashed lines. White arrows indicate colonizing human cells. Scale bar represents a distance of  $50\mu\text{m}$ .

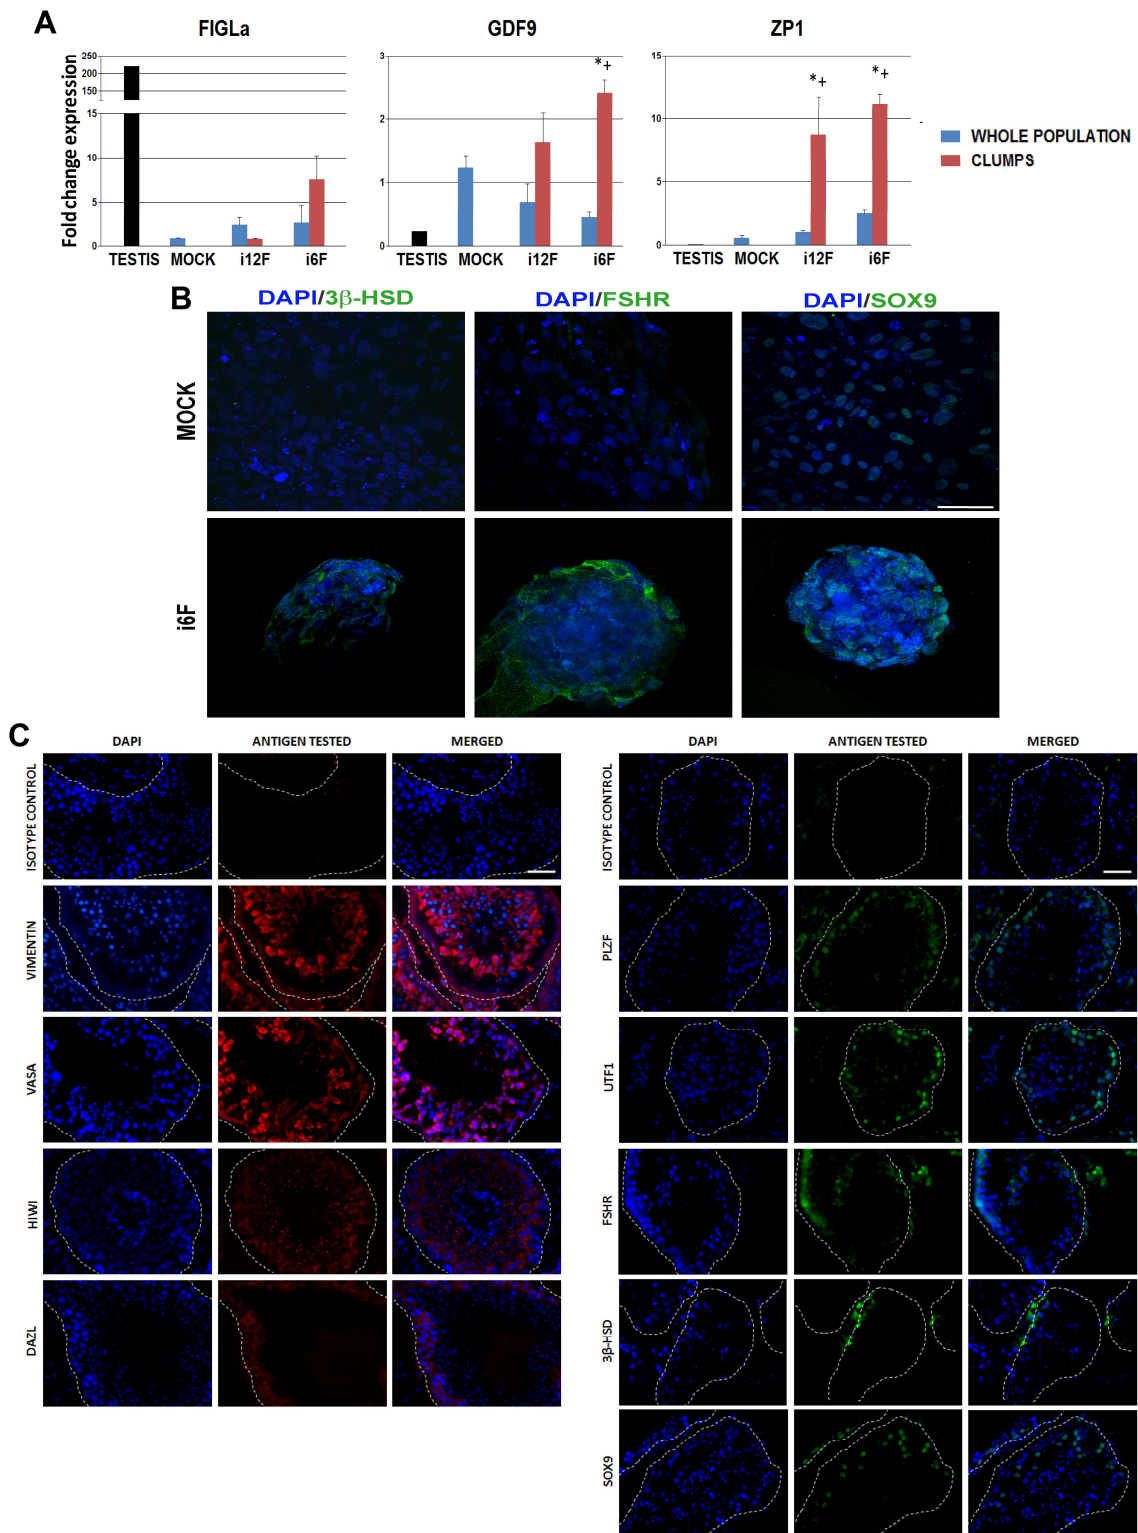

**Supplementary Figure S7. Male and female gonadal specific marker analysis and antibody staining controls. (A)** RTqPCR analysis of the expression of the follicle-specific developmental markers FIGL $\alpha$ , GDF9 and ZP1 over 12F/i6F induced hFSKs 14 days post-transduction. **(B)** Illustrative pictures of immunofluorescent stainings for

the Leydig cell marker  $3\beta$ HSD and the Sertoli cell markers FSHR and SOX9 over MOCK and i6F clumps from hFSK cells. (C) Antibody staining controls for primary antibodies over testicular sections. Data is presented as normalized fold change mean  $\pm$  SEM. (\*) represent significant differences ( $p < 0.05$ ) with controls; (+) represents significant differences ( $p < 0.05$ ) between i12F/i6F conditions and their respective induced germ-cell like cell clumps. Scale bar represents a distance of  $50\mu\text{m}$ .

### 3. Supplementary Tables.

**Supplementary Table S1. List of the top represented terms of the functional enrichment analysis over the i12F and i6F cultures compared to MOCK.** Term annotation % represents the ratio of represented genes in the list of the differentially expressed genes; GO, Gene Ontology; BP, Biological Process; MF, Molecular Function; CC, Cellular Compartment.

| Treatment | Term                                                                                            | GO level | Term annotation % | Annotated ids                                                               | Adjusted p-value |
|-----------|-------------------------------------------------------------------------------------------------|----------|-------------------|-----------------------------------------------------------------------------|------------------|
| i12F/i6F  | retinoic acid metabolic process (GO:0042573)                                                    | BP       | 1.3               | CYP26B1,CYP26A1,RBP1,MAFB                                                   | 1.38352E-3       |
| i12F/i6F  | negative regulation of cell growth (GO:0030308)                                                 | BP       | 2.28              | CGREF1,ENPP1,CDKN2C,BCL2,APB B2,INHBA,GREM1                                 | 4.55732E-3       |
| i12F/i6F  | mesenchymal cell development (GO:0014031)                                                       | BP       | 1.95              | HGF,BCL2,GDNF,CYP26A1,EDN1,MAFB                                             | 4.88577E-3       |
| i12F/i6F  | negative regulation of transcription factor activity (GO:0043433)                               | BP       | 1.63              | ID1,ID3,ID2,HMOX1,MAFB                                                      | 5.68985E-3       |
| i12F/i6F  | transcription initiation (GO:0006352)                                                           | BP       | 2.61              | HIST1H4D,HIST1H4L,HIST1H4F,HIST1H4C,HIST1H4J,HIST1H4E,HIST1H4I,MAFB         | 6.80627E-3       |
| i12F/i6F  | regulation of protein kinase activity (GO:0045859)                                              | BP       | 4.23              | GAP43,ADORA2B,PKMYT1,RGS4,HGF,CDKN2C,CDKN1C,ERN1,WNT7B,ITGA1,FPR1,EDN1,MAFB | 1.60413E-2       |
| i12F/i6F  | positive regulation of DNA replication (GO:0045740)                                             | BP       | 1.3               | AREG,IL6,CSF2,MAFB                                                          | 1.71113E-2       |
| i12F/i6F  | positive regulation of MAP kinase activity (GO:0043406)                                         | BP       | 2.28              | ADORA2B,HGF,WNT7B,ITGA1,FPR1,EDN1,MAFB                                      | 1.9534E-2        |
| i12F/i6F  | transforming growth factor beta receptor signaling pathway (GO:0007179)                         | BP       | 1.95              | ID1,GDF10,FMOD,CDKN1C,CHST11,MAFB                                           | 2.29673E-2       |
| i12F/i6F  | regulation of MAP kinase activity (GO:0043405)                                                  | BP       | 2.61              | ADORA2B,RGS4,HGF,WNT7B,ITGA1,FPR1,EDN1,MAFB                                 | 2.30361E-2       |
| i12F/i6F  | positive regulation of hormone secretion (GO:0046887)                                           | BP       | 1.3               | INHBA,CRH,EDN1,MAFB                                                         | 2.56881E-2       |
| i12F/i6F  | anti-apoptosis (GO:0006916)                                                                     | BP       | 3.26              | CLU,HGF,CDC2,BCL2,GDNF,FN1,HMOX1,IL6,CSF2,MAFB                              | 3.23274E-2       |
| i12F/i6F  | ovarian follicle development (GO:0001541)                                                       | BP       | 1.3               | BCL2,LFNG,INHBA,MAFB                                                        | 3.41505E-2       |
| i12F/i6F  | positive regulation of protein kinase activity (GO:0045860)                                     | BP       | 2.93              | GAP43,ADORA2B,HGF,ERN1,WNT7B,ITGA1,FPR1,EDN1,MAFB                           | 3.80244E-2       |
| i12F/i6F  | negative regulation of phosphorylation (GO:0042326)                                             | BP       | 1.3               | ENPP1,CDKN2C,CDKN1C,INHBA                                                   | 4.06159E-2       |
| i12F/i6F  | regulation of cell migration (GO:0030334)                                                       | BP       | 3.75              | SST, F10, IGFBP3, LAMA2, PRRX2, LAMA3, NEXN, ICAM1, IRS1,                   | 0.0421           |
| i12F/i6F  | positive regulation of tyrosine phosphorylation of STAT protein (GO:0042531)                    | BP       | 0.98              | IL6,CSF2,MAFB                                                               | 4.36689E-2       |
| i12F/i6F  | Positive regulation of gene-specific transcription from RNA polymerase II promoter (GO:0010552) | BP       | 1.28              | HMGB2,NR1H3,E2F1,GDNF,MAFB                                                  | 0.04461          |
| i12F/i6F  | ribonuclease H activity (GO:0004523)                                                            | MF       | 0.77              | RNASEH2A, FEN1, EXO1                                                        | 0.005892         |
| i12F/i6F  | chromatin (GO:0000785)                                                                          | CC       | 7.18              | HIST1H1A,HIST1H3B,HIST1H1B,HIST1H3D,HIST1H1D,HIST1H3F,HIST1                 | 4.12325E-9       |

|          |                                                          |          |      |                                                                                                                                                                                  |            |
|----------|----------------------------------------------------------|----------|------|----------------------------------------------------------------------------------------------------------------------------------------------------------------------------------|------------|
|          |                                                          |          |      | H4D,HIST1H2AL,HIST1H4L,HIST1H2AJ,HIST1H3H,HIST1H2AM,ID2,HIST1H4F,HIST1H4C,HIST2H2AC,HIST1H4J,ASF1B,HIST1H4E,KIF22,POLA1,TIMELESS,E2F1,HIST1H4I,OIP5,ABTB2,VDR,MAFB               |            |
| i12F/i6F | nucleosome (GO:0000786)                                  | CC       | 5.13 | HIST1H1A,HIST1H3B,HIST1H1B,HIST1H3D,HIST1H1D,HIST1H3F,HIST1H4D,HIST1H2AL,HIST1H4L,HIST1H2AJ,HIST1H3H,HIST1H2AM,HIST1H4F,HIST1H4C,HIST2H2AC,HIST1H4J,HIST1H4E,HIST1H4I,ABTB2,MAFB | 4.12325E-9 |
| i12F/i6F | chromosome, centromeric region (GO:0000775)              | CC       | 3.85 | ZWINT,SPAG5,CENPM,C13orf3,BIRC5,KIF2C,MLF1IP,KIF22,CDC48,ITGB3BP,CENPP,BUB1B,CENPF,OIP5,MAFB                                                                                     | 1.1716E-7  |
| i12F/i6F | spindle (GO:0005819)                                     | CC       | 3.33 | SPAG5,CDC2,TPX2,C13orf3,BIRC5,KIF15,KIF22,CDC6,PRC1,BUB1B,PLK1,NUSAP1,MYH9                                                                                                       | 2.07202E-5 |
| i12F/i6F | spindle microtubule (GO:0005876)                         | CC       | 1.54 | SPAG5,CDC2,C13orf3,BIRC5,PRC1,NUSAP1                                                                                                                                             | 2.31712E-4 |
| i12F/i6F | kinetochore (GO:0000776)                                 | CC       | 2.05 | ZWINT,SPAG5,CENPM,C13orf3,MLF1IP,KIF22,BUB1B,CENPF                                                                                                                               | 9.21283E-4 |
| i12F/i6F | condensed chromosome kinetochore (GO:0000777)            | CC       | 1.54 | ZWINT,SPAG5,CENPM,C13orf3,MLF1IP,BUB1B                                                                                                                                           | 5.08552E-3 |
| i12F/i6F | microtubule cytoskeleton (GO:0015630)                    | CC       | 5.64 | CDC45L,SPAG5,CDC2,TPX2,C13orf3,BIRC5,KIF2C,TOP2A,KIF15,KIF22,CDC48,CDC6,PRC1,BUB1B,GTSE1,PLK1,CENPF,NUSAP1,CEP55,MYH9,JUB,MAFB                                                   | 6.25947E-3 |
| i12F/i6F | condensed chromosome (GO:0000793)                        | CC       | 2.31 | NCAPG,ZWINT,SPAG5,CENPM,C13orf3,HMGB2,TOP2A,MLF1IP,BUB1B                                                                                                                         | 6.25947E-3 |
| i12F/i6F | integrin complex (GO:0008305)                            | CC       | 1.28 | ITGA2,MYH9,ITGA11,ITGA1,MAFB                                                                                                                                                     | 6.56309E-3 |
| i12F/i6F | condensed chromosome, centromeric region (GO:0000779)    | CC       | 1.54 | ZWINT,SPAG5,CENPM,C13orf3,MLF1IP,BUB1B                                                                                                                                           | 7.19236E-3 |
| i12F/i6F | secretory granule (GO:0030141)                           | CC       | 2.56 | PCSK1,GAL,CFD,PLA2G4A,HGF,NPTX1,FSTL3,ITGA1,FN1,MAFB                                                                                                                             | 1.66104E-2 |
| i12F/i6F | Collagen type IV (GO:0005587)                            | CC       | 1.25 | PRRX2, EGR1, COL4A4,                                                                                                                                                             | 0.01737    |
| i12F/i6F | Basement membrane (GO:0005604)                           | CC       | 2.5  | LAMA2, PRRX2, LAMA3, ANXA2P3, EGR1, COL4A4,                                                                                                                                      | 0.03728    |
| i12F/i6F | Cell Cycle, Mitotic (REACT_152)                          | REACTOME | 6.15 | CDC45L, PKMYT1, PRKAR2B, ZWINT, CENPM, UBE2C, CDC2,TYMS, BIRC5, RRM2, LIG1, KIF2C, MLF1IP, MCM5, CDC48,ITGB3BP, CDC6, POLA1, CENPP, FEN1, BUB1B, PLK1, E2F1,MAFB,                | 4.51E-08   |
| i12F/i6F | Telomere Maintenance (REACT_7970)                        | REACTOME | 3.08 | HIST1H4D, HIST1H4L, HIST1H2AJ, HIST1H4F, HIST1H4C, LIG1,HIST2H2AC, HIST1H4J, HIST1H4E, POLA1, FEN1, HIST1H4I,                                                                    | 4.51E-08   |
| i12F/i6F | Integrin cell surface interactions (REACT_13552)         | REACTOME | 2.92 | LAMA2, PRRX2, ICAM2, ICAM1, RASGRP2, EGR1, COL4A4,                                                                                                                               | 0.001781   |
| i12F/i6F | DNA Replication (REACT_383)                              | REACTOME | 1.79 | CDC45L, LIG1, MCM5, CDC6, POLA1, FEN1, E2F1,                                                                                                                                     | 0.03135    |
| i6F      | regulation of cell differentiation (GO:0045595)          | BP       | 7.56 | HIST1H4B,KRT84,HIST1H4K,IAPP,HIST1H4H,HIST2H4B,CHRN2,NPPC,SMAD1,SPP1,FGF2,APOE,LIF,ITGB3,JUN,SOD2,HES1                                                                           | 5.55655E-3 |
| i6F      | DNA packaging (GO:0006323)                               | BP       | 4.89 | HIST1H4B,HIST1H4K,HIST1H4H,HIST2H4B,HELLS,CHAF1B,NCAPG2,NCAPD3,HIST1H3G,STRA8,HIST2H2AA4                                                                                         | 1.0232E-2  |
| i6F      | negative regulation of cell differentiation (GO:0045596) | BP       | 4.44 | HIST1H4B,HIST1H4K,IAPP,HIST1H4H,HIST2H4B,SPP1,LIF,ITGB3,SOD2,HES1                                                                                                                | 1.45926E-2 |
| i6F      | negative regulation of DNA metabolic process             | BP       | 2.22 | ENPP7,BLM,IRF1,NPPC,STRA8                                                                                                                                                        | 1.77042E-2 |



|     |                                                  |          |       |                                                                                                                                              |            |
|-----|--------------------------------------------------|----------|-------|----------------------------------------------------------------------------------------------------------------------------------------------|------------|
|     | (GO:0051053)                                     |          |       |                                                                                                                                              |            |
| i6F | regulation of developmental process (GO:0050793) | BP       | 10.22 | HIST1H4B,KRT84,HIST1H4K,IAPP,HIST1H4H,HIST2H4B,SNCB,HELLS,CHRNB2,SFRP1,NPPC,SMAD1,SPP1,BIRC3,FGF2,SERPINE1,APOE,LIF,ITGB3,PDPN,JUN,SOD2,HES1 | 2.83648E-2 |
| i6F | DNA replication (GO:0006260)                     | BP       | 4.44  | ENPP7,PRIM1,GINS2,CHAF1B,BLM,RFC5,RFC4,IRF1,STRA8,JUN                                                                                        | 2.9385E-2  |
| i6F | chromosome (GO:0005694)                          | CC       | 7.56  | HIST1H4B, HIST1H4K, HIST1H4H, HIST2H4B, HELLS, CENPQ, PRIM1, CENPN, BLM, RFC5, NCAPD3, INCENP, RFC4, HIST1H3G, IRF1, JUN, HIST2H2AA4,        | 0.02965    |
| i6F | Telomere Maintenance (REACT_7970)                | REACTOME | 4     | HIST1H4B, HIST1H4K, HIST1H4H, HIST2H4B, PRIM1, RFC5, RFC4, IRF1, HIST2H2AA4,                                                                 | 4.71E-07   |

**Supplementary Table S2. Summary of FISH-based ploidy counts in hFSK cells.**

\*Aneuploid percentages include all the observed aneuploid combinations (1 18: 1 X: 1Y), (2 18: 2 X: 1Y), (2 18: 1 X: 2Y), (3 18: 1 X: 1Y), (3 18: 2 X: 2Y), (3 18: 2 X: 1Y), (2 18: 2 X: 2Y), (2 18: 0 X: 1Y) and (2 18: 1 X: 0Y).

| <b>% hFSK NUCLEI</b>      | <b>DIPLOID<br/>(2 18: 1 X: 1 Y)</b> | <b>HAPLOID<br/>(1 18: 1 X: 0 Y)</b> | <b>HAPLOID<br/>(1 18: 0 X: 1 Y)</b> | <b>TETRAPLOID<br/>(4 18: 2 X: 2 Y)</b> | <b>ANEUPLOID*</b> |
|---------------------------|-------------------------------------|-------------------------------------|-------------------------------------|----------------------------------------|-------------------|
| <b>MOCK WHOLE CULTURE</b> | 100.00 +/- 0.00                     | 0.00 +/- 0.00                       | 0.00 +/- 0.00                       | 0.00 +/- 0.00                          | 0.00 +/- 0.00     |
| <b>MOCK 1N SORTED</b>     | 99.41 +/- 1.78                      | 0.00 +/- 0.00                       | 0.10 +/- 0.10                       | 0.41 +/- 0.42                          | 0.08 +/- 0.09     |
| <b>i12F WHOLE CULTURE</b> | 94.16 +/- 1.64                      | 0.59 +/- 0.26                       | 0.42 +/- 0.18                       | 0.83 +/- 0.53                          | 0.44 +/- 0.26     |
| <b>i12F 1N SORTED</b>     | 90.38 +/- 1.77                      | 3.07 +/- 1.57                       | 2.61 +/- 1.62                       | 0.66 +/- 0.56                          | 0.36 +/- 0.27     |
| <b>i12F CLUMPS</b>        | 90.77 +/- 1.85                      | 0.67 +/- 0.33                       | 1.89 +/- 0.21                       | 2,25 +/- 0.91                          | 0,48 +/- 0.29     |
| <b>i6F WHOLE CULTURE</b>  | 95.40 +/- 1.24                      | 0.58 +/- 0.22                       | 0.48 +/- 0.12                       | 1.00 +/- 1.01                          | 0.27 +/- 0.03     |
| <b>i6F 1N SORTED</b>      | 84.45 +/- 0.67                      | 8.18 +/- 2.62                       | 4.26 +/- 1.56                       | 0.32 +/- 0.32                          | 0.30 +/- 0.01     |
| <b>i6F CLUMPS</b>         | 89.03 +/- 2.42                      | 4.91 +/- 3.87                       | 1.04 +/- 0.21                       | 1.35 +/- 0.73                          | 0.40 +/- 0.27     |

**Supplementary Table S3. Summary of FISH-based ploidy counts in hMSC cells.**

\*Aneuploid percentages include all the observed aneuploid combinations (1 18: 1 X: 1Y), (2 18: 2 X: 1Y), (2 18: 1 X: 2Y), (3 18: 1 X: 1Y), (3 18: 2 X: 2Y), (3 18: 2 X: 1Y), (2 18: 2 X: 2Y), (2 18: 0 X: 1Y) and (2 18: 1 X: 0Y).

| <b>% hMSC NUCLEI</b>      | <b>DIPLOID<br/>(2 18: 1 X: 1 Y)</b> | <b>HAPLOID<br/>(1 18: 1 X: 0 Y)</b> | <b>HAPLOID<br/>(1 18: 0 X: 1 Y)</b> | <b>TETRAPLOID<br/>(4 18: 2 X: 2 Y)</b> | <b>ANEUPLOID*</b> |
|---------------------------|-------------------------------------|-------------------------------------|-------------------------------------|----------------------------------------|-------------------|
| <b>MOCK WHOLE CULTURE</b> | 100.00 +/- 0,00                     | 0.00 +/- 0.00                       | 0.00 +/- 0.00                       | 0.00 +/- 0.00                          | 0.00 +/- 0.00     |
| <b>MOCK 1N SORTED</b>     | 87.66 +/- 4.96                      | 0.00 +/- 0.00                       | 0.00 +/- 0.00                       | 2.32 +/- 2.33                          | 1.11 +/- 0.50     |
| <b>i12F WHOLE CULTURE</b> | 91.82 +/- 2.05                      | 0.75 +/- 0.19                       | 0.24 +/- 0.18                       | 2.46 +/- 0.89                          | 0.52 +/- 0.38     |
| <b>i12F 1N SORTED</b>     | 76.84 +/- 4.39                      | 17.79 +/- 6.26                      | 0.91 +/- 0.70                       | 0.00 +/- 0.00                          | 0.49 +/- 0.30     |
| <b>i6F WHOLE CULTURE</b>  | 90.90 +/- 2.15                      | 2.28 +/- 0.74                       | 1.82 +/- 0.70                       | 3.93 +/- 1.27                          | 0.11 +/- 0.08     |
| <b>i6F 1N SORTED</b>      | 80.00 +/- 2.35                      | 20.00 +/- 0.98                      | 0.00 +/- 0.00                       | 0.00 +/- 0.00                          | 0.00 +/- 0.00     |

**Supplementary Table S4. Primer sequences 5'-3' used to gene expression analysis by RT-qPCR.**

| <b>GENE</b>   | <b>PRIMER SEQUENCES</b>    | <b>LENGTH</b> |
|---------------|----------------------------|---------------|
| <b>PRDM1</b>  | F: GCCAAGTTCACCCAGTTTGT    | 183           |
|               | R: GATTCGGGTCAGATCTTCCA    |               |
| <b>PRDM14</b> | F: TCTCTACGATCTGCCCTGGT    | 231           |
|               | R: CTCAGCCCCTCAGGTAACAG    |               |
| <b>LIN28A</b> | F: CTTCTCCGAACCAACCCTTT    | 239           |
|               | R: CGCACGTTGAACCACTTACA    |               |
| <b>NANOG</b>  | F: GATTTGTGGGCCTGAAGAAA    | 155           |
|               | R: AAGTGGGTGTTTGCCTTTG     |               |
| <b>NANOS3</b> | F: GGGAAAGAGGGTCCTGAAAC    | 221           |
|               | R: AGCACGTGGGACTGGTAGAT    |               |
| <b>DAZ2</b>   | F: GAGATTGGAAGCTGCTTTGG    | 212           |
|               | R: TGCACATGACGAGCACATAA    |               |
| <b>DAZL</b>   | F: AATGACGTGGATGTGCAGAA    | 152           |
|               | R: AACTGTGGTGGAGGAGGATG    |               |
| <b>BOLL</b>   | F: CTAATCCTGTGTCACCTGTGC   | 205           |
|               | R: ACGAAACCATAACCCTTTGGA   |               |
| <b>VASA</b>   | F: ATGGATGATGGACCTTCTCGA   | 248           |
|               | R: CCTCTGTTCCGTGTTGGATT    |               |
| <b>STRA8</b>  | F: AATCCCATGACAGAGCAAC     | 227           |
|               | R: TTATCCAGGGTTTGCTCCAG    |               |
| <b>SYCP3</b>  | F: AGCCGTCTGTGGAAGATCAG    | 197           |
|               | R: AACTCCAACCTCCTCCAGCA    |               |
| <b>DMC1</b>   | F: CTTTCAGGCAGATCCCAAAA    | 172           |
|               | R: CCCAATTCCTCCAGCAGTTA    |               |
| <b>CDH1</b>   | F: TGAAGGTGACAGAGCCTCTGGAT | 151           |

|                 |                            |     |
|-----------------|----------------------------|-----|
|                 | R: TGGGTGAATTCGGGCTTGTT    |     |
| <b>STELLA</b>   | F: CAGTCTCAGGGAAATCGAA     | 203 |
|                 | R: GCAGAAACTGCAGGGACATT    |     |
| <b>FRAGILIS</b> | F: ATGTCGTCTGGTCCCTGTTC    | 267 |
|                 | R: AACCCCGTTTTTCCTGTATT    |     |
| <b>GFRA1</b>    | F: GCAAGGAGACCAACTTCAGC    | 190 |
|                 | R: TCCTCCAGCAGATGATTTCC    |     |
| <b>PIWIL2</b>   | F: GTTAATGGTGATCGGGATGG    | 120 |
|                 | R: ATGCATGCCATTTATCAGCA    |     |
| <b>TNP2</b>     | F: CCAACACTAGTCCACCACCA    | 197 |
|                 | R: GTTGGATTTCCATCCTGAGC    |     |
| <b>PRM1</b>     | F: CCGCCAGAGACAAAGAAGTC    | 200 |
|                 | R: GGATGGTGGCATTTTCAAGA    |     |
| <b>ACRO</b>     | F: ATTCTGCTGGTCTTGGCAGT    | 192 |
|                 | R: TGTGTGGTACCTGTGGCTGT    |     |
| <b>DNMT1</b>    | F: TACCTGGACGACCCTGACCTC   | 103 |
|                 | R: CGTTGGCATCAAAGATGGACA   |     |
| <b>DNMT3A</b>   | F: TATTGATGAGCGCACAAGAGAGC | 111 |
|                 | R: GGGTGTTCAGGGTAACATTGAG  |     |
| <b>DNMT3B</b>   | F: GGCAAGTTCTCCGAGGTCTCTG  | 188 |
|                 | R: TGGTACATGGCTTTTCGATAGGA |     |
| <b>TET1</b>     | F: GCTATACACAGAGCTCACAG    | 139 |
|                 | R: GCCAAAAGAGAATGAAGCTCC   |     |
| <b>TET2</b>     | F: CTTTCCTCCCTGGAGAACAGCTC | 146 |
|                 | R: TGCTGGGACTGCTGCATGACT   |     |
| <b>TET3</b>     | F: ATTCTGCTGGTCTTGGCAGT    | 193 |
|                 | R: TGTGTGGTACCTGTGGCTGT    |     |
| <b>RPL19</b>    | F: GTTCCTGGAGCATGTA CTTC   | 199 |
|                 | R: CTTCTCTTTGGGATTGTCC     |     |

|                                |                            |     |
|--------------------------------|----------------------------|-----|
| <b>T (BRACHYURY)</b>           | F: TCAGCAAAGTCAAGCTCACCA   | 102 |
|                                | R: CCCCAACTCTCACTATGTGGATT |     |
| <b>SOX17</b>                   | F: TCTGCCTCCTCCACGAAG      | 101 |
|                                | R: CAGAATCCAGACCTGCACAA    |     |
| <b>CD38</b>                    | F: TTGGGAACTCAGACCGTACC    | 200 |
|                                | R: GTTGCTGCAGTCCTTTCTCC    |     |
| <b>TFCP2L1</b>                 | F: GTGTACCACGCCATCTTCCT    | 176 |
|                                | R: TGTGCTGAGGACAAAACAGG    |     |
| <b>FIGL<math>\alpha</math></b> | F: AATCTCAACCGTGGTTTTGC    | 215 |
|                                | R: CTTGCCGAGGATCTATGTGA    |     |
| <b>GDF9</b>                    | F: GGGAGAAGCTCAGATTGCTG    | 225 |
|                                | R: GGAATCCCTTCCTTGGTAGC    |     |
| <b>ZP1</b>                     | F: CGCCATGTTCTCTGTCTCAA    | 161 |
|                                | R: CGTTTGTTACATCCCAGTG     |     |

**Supplementary Table S5. List of the antibodies employed.**

| <b>ANTIGEN</b>                          | <b>HOST</b> | <b>COMPANY</b> | <b>DILUTION</b> |
|-----------------------------------------|-------------|----------------|-----------------|
| <b>VIMENTIN</b>                         | Mouse       | Dako           | 1:200           |
| <b>Human PLZF</b>                       | Mouse       | R&D            | 1:50            |
| <b>UTF1</b>                             | Mouse       | Milipore       | 1:50            |
| <b>VASA</b>                             | Goat        | R&D            | 1:200           |
| <b>DAZL</b>                             | Rabbit      | Abcam          | 1:200           |
| <b>HIWI</b>                             | Rabbit      | Novex          | 1:200           |
| <b>Human-SYCP3</b>                      | Rabbit      | Novus          | 1:75            |
| <b>Human-centromere protein (CREST)</b> | Human       | Fisher         | 1:1000          |
| <b>5-methyl Cytosine (5-mC)</b>         | Mouse       | Eurogentec     | 1:500           |
| <b>5-hydroxymethyl Cytosine (hmC)</b>   | Rabbit      | Active motif   | 1:200           |
| <b>Human NuMA</b>                       | Rabbit      | Abcam          | 1:200           |
| <b>3<math>\beta</math>-HSD</b>          | Mouse       | Abcam          | 1:50            |
| <b>FSHR</b>                             | Rabbit      | Abcam          | 1:50            |
| <b>SOX9</b>                             | Mouse       | Abcam          | 1:50            |
